# Supplementary material
Source: PubMed Central journal article supplement (PMC3522741)
Supplement: NIHMS2559-supplement-supplementary.pdf [file NIHMS2559-supplement-supplementary.pdf]

Neuron, volume 71

## Supplemental Information

# Endocannabinoids Gate State-Dependent Plasticity of Synaptic Inhibition in Feeding Circuits

Karen M. Crosby, Wataru Inoue, Quentin J. Pittman, and Jaideep S. Bains

Inventory of Supplemental Information

### **Supplementary Figure 1. Heterogeneity of DMH neurons has no impact on induction of LTD<sub>GABA</sub>**

Related to figure 1 in manuscript.

### **Supplementary Figure 2. HFS elicits LTP<sub>GABA</sub> in CB1<sup>-/-</sup> mice**

Related to figure 2 in manuscript.

**Supplementary Figure 1. Heterogeneity of DMH neurons has no impact on induction of LTD<sub>GABA</sub>**

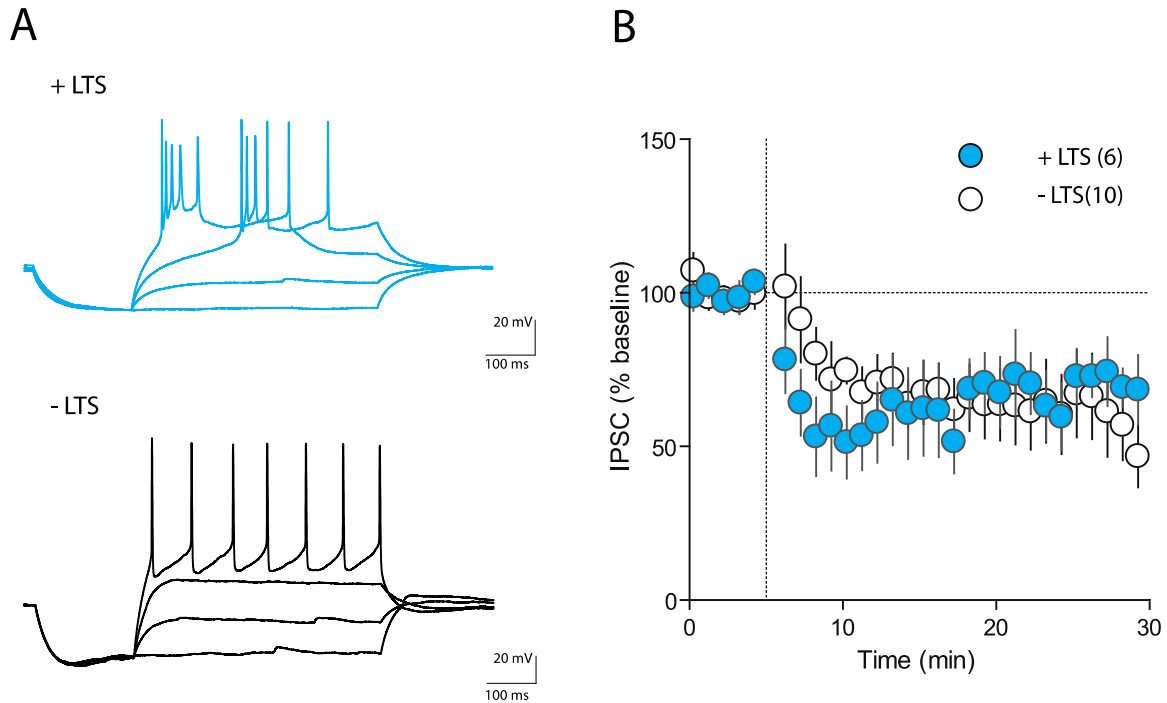

Two distinct electrical fingerprints were observed in DMH neurons. Current clamp traces in top panel represent a subset of neurons that exhibited low-threshold spikes when the membrane was depolarized from negative potentials. A second proportion of cells exhibited no LTS (lower panel). (B) There was no difference in the capacity of the different cell types to undergo LTD. The numbers in parentheses indicate number of cells tested.

**Supplementary Figure 1. Heterogeneity of DMH neurons has no impact on induction of LTD<sub>GABA</sub>**

Two distinct electrical fingerprints were observed in DMH neurons. Current clamp traces in DMH neurons. Current clamp traces in top panel represent a subset of neurons that exhibited low-threshold spikes when the membrane was depolarized from negative potentials. A second proportion of cells exhibited no LTS (lower panel). (B) There was no difference in the capacity of the different cell types to undergo LTD. The numbers in parentheses indicate number of cells tested.

**Supplementary Figure 2. HFS elicits LTP<sub>GABA</sub> in CB1<sup>-/-</sup> mice**

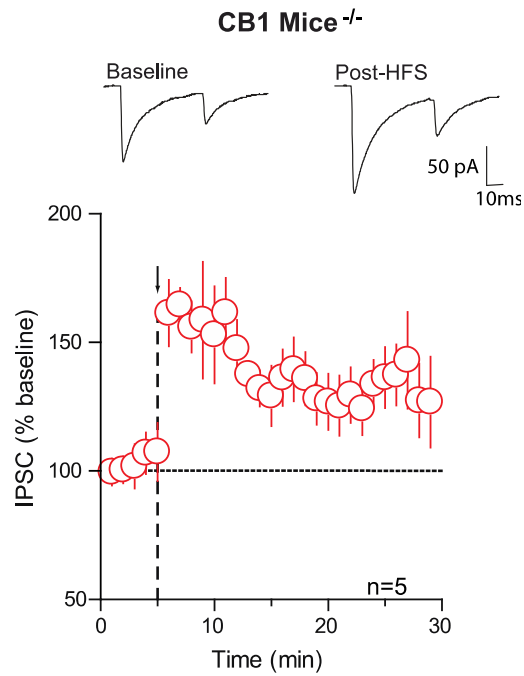

Summary of effects of HFS on IPSCs in CB1<sup>-/-</sup> mice. Sample traces are shown above.

**Supplementary Figure 2. HFS elicits LTP<sub>GABA</sub> in CB1<sup>-/-</sup> mice**

Summary of effects of HFS on IPSCs in CB1<sup>-/-</sup> mice. Sample traces are shown above.
